# Supplementary material for: Detection and long-term quantification of methane emissions from an active landfill
Source: Copernicus journal article supplement (doi:10.5194/amt-17-1229-2024), 2024-02-22
Supplement: Supplementary file 1 [file amt-17-1229-2024-supplement.zip]

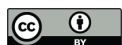

## *Supplement of*

# **Detection and long-term quantification of methane emissions from an active landfill**

**Pramod Kumar et al.**

*Correspondence to:* Pramod Kumar ([pramod.kumar@lsce.ipsl.fr](mailto:pramod.kumar@lsce.ipsl.fr))

- [amt-17-1229-2024-supplement-title-page.pdf](#)
- [supporting\\_information](#)
  - [SI-1\\_All\\_campaigns.pdf](#)
  - [SI-2\\_inversions.pdf](#)

The copyright of individual parts of the supplement might differ from the article licence.
